# Supplementary material
Source: PubMed Central journal article supplement (PMC6200023)
Supplement: Supp_Table1.pdf [file Supp_Table1.pdf]

**Supplementary Table 1. Strict cgMLST gene variants detected in the four analyzed genomes.**

| Gene            | 7 (BC) | 2 (BC) | 1 (BC) | 13 (BC) |
|-----------------|--------|--------|--------|---------|
| accB (KP1 4981) | 1      | 1      | 4      | 1       |
| accC (KP1 4982) | 2      | 2      | 5      | 2       |
| accD (KP1 3954) | 5      | 5      | 6      | 5       |
| aceA (KP1 0254) | 38     | 38     | 6      | 38      |
| aceB (KP1 0253) | 38     | 38     | 6      | 38      |
| aceK (KP1 0255) | 44     | 44     | 6      | 44      |
| adk (KP1 1334)  | 2      | 2      | 6      | 2       |
| amiA (KP1 4028) | 53     | 53     | 6      | 53      |
| amiC (KP1 4494) | 88     | 88     | 6      | 88      |
| ampD (KP1 0933) | 1      | 1      | 1      | 1       |
| ampE (KP1 0934) | 59     | 59     | 3      | 59      |
| anmK (KP1 3050) | 11     | 11     | 6      | 11      |
| apaG (KP1 0860) | 1      | 1      | 1      | 1       |
| apaH (KP1 0859) | 2      | 2      | 4      | 2       |
| apbA (KP1 1245) | 4      | 4      | 2      | 4       |
| araA (KP1 0874) | 86     | 86     | 6      | 86      |
| araB (KP1 0875) | 101    | 101    | 6      | 101     |
| araC (KP1 0876) | 47     | 47     | 6      | 47      |
| araD (KP1 0873) | 23     | 23     | 6      | 23      |
| arcA (KP1 0818) | 4      | 4      | 5      | 4       |
| argA (KP1 4495) | 74     | 74     | 6      | 74      |
| aroB (KP1 5090) | 44     | 44     | 4      | 44      |
| aroC (KP1 3969) | 77     | 77     | 6      | 77      |
| aroE (KP1 0890) | 53     | 53     | 4      | 53      |
| aroK (KP1 5091) | 1      | 1      | 1      | 1       |
| asd (KP1 5132)  | 12     | 12     | 5      | 12      |
| atpB (KP1 5521) | 1      | 1      | 3      | 1       |
| atpE (KP1 5520) | 1      | 1      | 1      | 1       |
| atpF (KP1 5519) | 1      | 1      | 1      | 1       |
| atpI (KP1 5522) | 1      | 1      | 1      | 1       |
| bcr (KP1 3845)  | 93     | 93     | 6      | 93      |
| betA (KP1 1528) | 101    | 101    | 5      | 101     |
| betB (KP1 1529) | 102    | 102    | 5      | 102     |
| betT (KP1 1531) | 98     | 98     | 5      | 98      |
| bipA (KP1 0031) | 4      | 4      | 5      | 4       |
| blc (KP1 0421)  | 19     | 19     | 5      | 19      |
| btuB (KP1 0121) | 89     | 89     | 6      | 89      |
| cbiQ (KP1 4451) | 60     | 60     | 6      | 60      |
| cbpA (KP1 0376) | 47     | 47     | 6      | 47      |
| celA (KP1 2262) | 29     | 29     | 3      | 29      |
| celC (KP1 2265) | 9      | 9      | 4      | 9       |
| chaA (KP1 3343) | 83     | 83     | 5      | 83      |
| chaB (KP1 3342) | 1      | 1      | 1      | 1       |
| chaC (KP1 3341) | 34     | 34     | 1      | 34      |
| clpP (KP1 1270) | 25     | 25     | 3      | 25      |
| clpX (KP1 1271) | 62     | 62     | 6      | 62      |
| coaE (KP1 0926) | 2      | 2      | 3      | 2       |

|                  |     |     |    |     |
|------------------|-----|-----|----|-----|
| cobD (KP1 4493)  | 90  | 90  | 6  | 90  |
| cpxA (KP1 0078)  | 73  | 73  | 5  | 73  |
| cpxP (KP1 0080)  | 2   | 2   | 4  | 2   |
| cpxR (KP1 0079)  | 3   | 3   | 3  | 3   |
| creB (KP1 0815)  | 13  | 13  | 6  | 13  |
| creC (KP1 0816)  | 97  | 97  | 6  | 97  |
| crl (KP1 1098)   | 10  | 10  | 5  | 10  |
| crp (KP1 5071)   | 3   | 3   | 3  | 3   |
| cspE (KP1 1611)  | 1   | 1   | 1  | 1   |
| cyaY (KP1 0166)  | 2   | 2   | 1  | 2   |
| cydA (KP1 1693)  | 79  | 79  | 5  | 79  |
| cydB (KP1 1694)  | 80  | 80  | 5  | 80  |
| cysG (KP1 5084)  | 85  | 85  | 6  | 85  |
| dam (KP1 5088)   | 40  | 40  | 4  | 40  |
| dapA4 (KP1 3539) | 91  | 91  | 6  | 91  |
| dapF (KP1 0168)  | 56  | 56  | 5  | 56  |
| dcuC (KP1 1608)  | 93  | 93  | // | 93  |
| dedA (KP1 3956)  | 3   | 3   | 45 | 3   |
| def (KP1 5005)   | 37  | 37  | 1  | 37  |
| deoA (KP1 0797)  | 13  | 13  | 5  | 13  |
| deoB (KP1 0799)  | 14  | 14  | 6  | 14  |
| dkgB (KP1 1065)  | 81  | 81  | 5  | 81  |
| dksA (KP1 0973)  | 1   | 1   | 1  | 1   |
| dnaC (KP1 0770)  | 4   | 4   | 4  | 4   |
| dnaT (KP1 0771)  | 2   | 2   | 4  | 2   |
| dps (KP1 1799)   | 26  | 26  | 1  | 26  |
| dsbC (KP1 4609)  | 43  | 43  | 5  | 43  |
| ecnA (KP1 0418)  | 11  | 11  | 3  | 11  |
| ecnB (KP1 0419)  | 1   | 1   | 1  | 1   |
| efp (KP1 0416)   | 20  | 20  | 5  | 20  |
| emrA (KP1 4279)  | 94  | 94  | 17 | 94  |
| emrR (KP1 4277)  | 1   | 1   | 1  | 1   |
| endA (KP1 4653)  | 1   | 1   | 6  | 1   |
| engB (KP1 0025)  | 3   | 3   | 4  | 3   |
| epd (KP1 4644)   | 1   | 1   | 5  | 1   |
| exoX (KP1 3488)  | 58  | 58  | 6  | 58  |
| fabD (KP1 2081)  | 8   | 8   | 6  | 8   |
| fabF (KP1 2084)  | 76  | 76  | 6  | 76  |
| fabG (KP1 2082)  | 27  | 27  | 3  | 27  |
| fabH (KP1 2080)  | 1   | 1   | 4  | 1   |
| fadA (KP1 0202)  | 35  | 35  | 6  | 35  |
| fadD (KP1 3447)  | 106 | 106 | 6  | 106 |
| fbaA (KP1 4642)  | 63  | 63  | 6  | 63  |
| fhuF (KP1 0781)  | 2   | 2   | 1  | 2   |
| fldA (KP1 1660)  | 4   | 4   | 3  | 4   |
| fldB (KP1 4611)  | 39  | 39  | 4  | 39  |
| flk (KP1 3961)   | 39  | 39  | 6  | 39  |
| folA (KP1 0858)  | 1   | 1   | 1  | 1   |
| folB (KP1 4749)  | 7   | 7   | 4  | 7   |
| folE (KP1 3818)  | 4   | 4   | 1  | 4   |

|                  |     |     |    |     |
|------------------|-----|-----|----|-----|
| folK (KP1 0969)  | 3   | 3   | 6  | 3   |
| folX (KP1 3939)  | 2   | 2   | 2  | 2   |
| firdD (KP1 0422) | 5   | 5   | 6  | 5   |
| fre (KP1 0201)   | 2   | 2   | 5  | 2   |
| frr (KP1 1026)   | 34  | 34  | 5  | 34  |
| frsA (KP1 1097)  | 42  | 42  | 1  | 42  |
| fruR (KP1 0900)  | 60  | 60  | 6  | 60  |
| fsr (KP1 1338)   | 86  | 86  | 6  | 86  |
| ftnA (KP1 3535)  | 42  | 42  | 1  | 42  |
| ftsI (KP1 0906)  | 97  | 97  | 5  | 97  |
| ftsL (KP1 0905)  | 2   | 2   | 2  | 2   |
| fur (KP1 1659)   | 2   | 2   | 1  | 2   |
| galR (KP1 4519)  | 89  | 89  | 5  | 89  |
| galS (KP1 3816)  | 6   | 6   | 6  | 6   |
| gidB (KP1 5523)  | 1   | 1   | 4  | 1   |
| glgA (KP1 5128)  | 11  | 11  | 5  | 11  |
| glgB (KP1 5131)  | 104 | 104 | // | 104 |
| glgC (KP1 5129)  | 56  | 56  | 3  | 56  |
| glgX (KP1 5130)  | 96  | 96  | 5  | 96  |
| glnA (KP1 0030)  | 11  | 11  | 1  | 11  |
| glnG (KP1 0028)  | 84  | 84  | 5  | 84  |
| glnH (KP1 1797)  | 2   | 2   | 4  | 2   |
| glnL (KP1 0029)  | 25  | 25  | 5  | 25  |
| glnS (KP1 1653)  | 86  | 86  | 5  | 86  |
| gloA (KP1 3063)  | 3   | 3   | 2  | 3   |
| glpF (KP1 5368)  | 42  | 42  | 1  | 42  |
| glpK (KP1 5370)  | 94  | 94  | 6  | 94  |
| gltS (KP1 5371)  | 24  | 24  | 4  | 24  |
| glyA (KP1 4130)  | 77  | 77  | 6  | 77  |
| gph (KP1 5086)   | 6   | 6   | 4  | 6   |
| gpt (KP1 1096)   | 24  | 24  | 1  | 24  |
| grpE (KP1 4192)  | 1   | 1   | 4  | 1   |
| grxC (KP1 5303)  | 1   | 1   | 1  | 1   |
| gshB (KP1 4656)  | 8   | 8   | 4  | 8   |
| gsk (KP1 1336)   | 81  | 81  | 5  | 81  |
| gst (KP1 3045)   | 5   | 5   | 5  | 5   |
| guaC (KP1 0928)  | 27  | 27  | 4  | 27  |
| gudP (KP1 0884)  | 95  | 95  | // | 95  |
| hcp (KP1 1873)   | 95  | 95  | 6  | 95  |
| hcr (KP1 1872)   | 28  | 28  | 4  | 28  |
| hemE (KP1 0237)  | 82  | 82  | 6  | 82  |
| hemF (KP1 4029)  | 4   | 4   | 6  | 4   |
| hemH (KP1 1335)  | 12  | 12  | 6  | 12  |
| hemK (KP1 3348)  | 6   | 6   | 5  | 6   |
| hemN (KP1 0027)  | 82  | 82  | 5  | 82  |
| hflC (KP1 0444)  | 73  | 73  | 4  | 73  |
| hflK (KP1 0443)  | 26  | 26  | 6  | 26  |
| hflX (KP1 0442)  | 12  | 12  | 5  | 12  |
| hfq (KP1 0441)   | 1   | 1   | 1  | 1   |
| hmpA (KP1 4131)  | 73  | 73  | 6  | 73  |

|                     |     |     |    |     |
|---------------------|-----|-----|----|-----|
| hmsS (KP1 0380)     | 39  | 39  | 5  | 39  |
| holA (KP1 1627)     | 79  | 79  | 5  | 79  |
| holB (KP1 2088)     | 6   | 6   | 2  | 6   |
| holD (KP1 0786)     | 41  | 41  | 1  | 41  |
| holE (KP1 3487)     | 1   | 1   | 5  | 1   |
| hpt (KP1 0960)      | 3   | 3   | 2  | 3   |
| hscB (KP1 4111)     | 1   | 1   | 1  | 1   |
| hupB (KP1 1273)     | 1   | 1   | 1  | 1   |
| iclR (KP1 0256)     | 17  | 17  | // | 17  |
| ihfB (KP1 1912)     | 1   | 1   | 1  | 1   |
| ilvA (KP1 0133)     | 40  | 40  | 6  | 40  |
| ilvD (KP1 0132)     | 13  | 13  | 6  | 13  |
| ilvE (KP1 0131)     | 2   | 2   | 5  | 2   |
| ilvH (KP1 0899)     | 35  | 35  | 5  | 35  |
| ilvI (KP1 0898)     | 93  | 93  | 6  | 93  |
| ilvM (KP1 0130)     | 3   | 3   | 3  | 3   |
| ilvY (KP1 0134)     | 68  | 68  | 6  | 68  |
| iscA (KP1 4112)     | 1   | 1   | 1  | 1   |
| iscR (KP1 4115)     | 1   | 1   | 1  | 1   |
| iscS (KP1 4114)     | 9   | 9   | 5  | 9   |
| ispC (KP1 1027)     | 4   | 4   | 6  | 4   |
| kdsA (KP1 3345)     | 46  | 46  | 1  | 46  |
| kefC (KP1 0857)     | 100 | 100 | 6  | 100 |
| KP1 0026 (KP1 0026) | 3   | 3   | 2  | 3   |
| KP1 0077 (KP1 0077) | 4   | 4   | 4  | 4   |
| KP1 0118 (KP1 0118) | 1   | 1   | 1  | 1   |
| KP1 0120 (KP1 0120) | 1   | 1   | 1  | 1   |
| KP1 0122 (KP1 0122) | 15  | 15  | 6  | 15  |
| KP1 0167 (KP1 0167) | 1   | 1   | 3  | 1   |
| KP1 0169 (KP1 0169) | 4   | 4   | 5  | 4   |
| KP1 0183 (KP1 0183) | 1   | 1   | 5  | 1   |
| KP1 0193 (KP1 0193) | 2   | 2   | 4  | 2   |
| KP1 0239 (KP1 0239) | 1   | 1   | 1  | 1   |
| KP1 0241 (KP1 0241) | 1   | 1   | 2  | 1   |
| KP1 0242 (KP1 0242) | 59  | 59  | 5  | 59  |
| KP1 0299 (KP1 0299) | 5   | 5   | 1  | 5   |
| KP1 0300 (KP1 0300) | 1   | 1   | 2  | 1   |
| KP1 0375 (KP1 0375) | 2   | 2   | 3  | 2   |
| KP1 0378 (KP1 0378) | 4   | 4   | 6  | 4   |
| KP1 0379 (KP1 0379) | 76  | 76  | 6  | 76  |
| KP1 0445 (KP1 0445) | 4   | 4   | 5  | 4   |
| KP1 0446 (KP1 0446) | 5   | 5   | 6  | 5   |
| KP1 0467 (KP1 0467) | 1   | 1   | 5  | 1   |
| KP1 0513 (KP1 0513) | 7   | 7   | 3  | 7   |
| KP1 0514 (KP1 0514) | 4   | 4   | 6  | 4   |
| KP1 0515 (KP1 0515) | 98  | 98  | 6  | 98  |
| KP1 0516 (KP1 0516) | 98  | 98  | 6  | 98  |
| KP1 0517 (KP1 0517) | 4   | 4   | 6  | 4   |
| KP1 0567 (KP1 0567) | 90  | 90  | 6  | 90  |
| KP1 0568 (KP1 0568) | 95  | 95  | 6  | 95  |

|                     |    |    |    |    |
|---------------------|----|----|----|----|
| KP1 0569 (KP1 0569) | 94 | 94 | // | 94 |
| KP1 0775 (KP1 0775) | 92 | 92 | 5  | 92 |
| KP1 0776 (KP1 0776) | 6  | 6  | 6  | 6  |
| KP1 0801 (KP1 0801) | 24 | 24 | 1  | 24 |
| KP1 0882 (KP1 0882) | 1  | 1  | 1  | 1  |
| KP1 0903 (KP1 0903) | 3  | 3  | 1  | 3  |
| KP1 0925 (KP1 0925) | 1  | 1  | 3  | 1  |
| KP1 0927 (KP1 0927) | 1  | 1  | 2  | 1  |
| KP1 0935 (KP1 0935) | 73 | 73 | 5  | 73 |
| KP1 0936 (KP1 0936) | 66 | 66 | 6  | 66 |
| KP1 0945 (KP1 0945) | 36 | 36 | 4  | 36 |
| KP1 0946 (KP1 0946) | 79 | 79 | 5  | 79 |
| KP1 0965 (KP1 0965) | 3  | 3  | 6  | 3  |
| KP1 1068 (KP1 1068) | 3  | 3  | 5  | 3  |
| KP1 1206 (KP1 1206) | 81 | 81 | 5  | 81 |
| KP1 1207 (KP1 1207) | 46 | 46 | 4  | 46 |
| KP1 1209 (KP1 1209) | 2  | 2  | 2  | 2  |
| KP1 1211 (KP1 1211) | 75 | 75 | 3  | 75 |
| KP1 1227 (KP1 1227) | 1  | 1  | 1  | 1  |
| KP1 1228 (KP1 1228) | 70 | 70 | 6  | 70 |
| KP1 1246 (KP1 1246) | 8  | 8  | 6  | 8  |
| KP1 1248 (KP1 1248) | 92 | 92 | 6  | 92 |
| KP1 1251 (KP1 1251) | 63 | 63 | 1  | 63 |
| KP1 1275 (KP1 1275) | 25 | 25 | 1  | 25 |
| KP1 1607 (KP1 1607) | 5  | 5  | 4  | 5  |
| KP1 1612 (KP1 1612) | 38 | 38 | 5  | 38 |
| KP1 1623 (KP1 1623) | 6  | 6  | 1  | 6  |
| KP1 1624 (KP1 1624) | 1  | 1  | // | 1  |
| KP1 1655 (KP1 1655) | 51 | 51 | 5  | 51 |
| KP1 1656 (KP1 1656) | 1  | 1  | 3  | 1  |
| KP1 1657 (KP1 1657) | 34 | 34 | 5  | 34 |
| KP1 1661 (KP1 1661) | 1  | 1  | 1  | 1  |
| KP1 1663 (KP1 1663) | 2  | 2  | 1  | 2  |
| KP1 1696 (KP1 1696) | 1  | 1  | 1  | 1  |
| KP1 1697 (KP1 1697) | 2  | 2  | 2  | 2  |
| KP1 1726 (KP1 1726) | 1  | 1  | 3  | 1  |
| KP1 1727 (KP1 1727) | 20 | 20 | 1  | 20 |
| KP1 1728 (KP1 1728) | 1  | 1  | 1  | 1  |
| KP1 1729 (KP1 1729) | // | 3  | // | 3  |
| KP1 1730 (KP1 1730) | 6  | 6  | 10 | 6  |
| KP1 1731 (KP1 1731) | 1  | 1  | 2  | 1  |
| KP1 1732 (KP1 1732) | 2  | 2  | 4  | 2  |
| KP1 1734 (KP1 1734) | 62 | 62 | 6  | 62 |
| KP1 1803 (KP1 1803) | 2  | 2  | 4  | 2  |
| KP1 1853 (KP1 1853) | 38 | 38 | 6  | 38 |
| KP1 1855 (KP1 1855) | 52 | 52 | 3  | 52 |
| KP1 1916 (KP1 1916) | 93 | 93 | 6  | 93 |
| KP1 2044 (KP1 2044) | 18 | 18 | 6  | 18 |
| KP1 2047 (KP1 2047) | 6  | 6  | 6  | 6  |
| KP1 2048 (KP1 2048) | 37 | 37 | // | 37 |

|                     |    |    |    |    |
|---------------------|----|----|----|----|
| KP1 2077 (KP1 2077) | 1  | 1  | 1  | 1  |
| KP1 2092 (KP1 2092) | 1  | 1  | 1  | 1  |
| KP1 2104 (KP1 2104) | 33 | 33 | 33 | 33 |
| KP1 2220 (KP1 2220) | 1  | 1  | 5  | 1  |
| KP1 2224 (KP1 2224) | 3  | 3  | 2  | 3  |
| KP1 2225 (KP1 2225) | 2  | 2  | 1  | 2  |
| KP1 2532 (KP1 2532) | 6  | 6  | 2  | 6  |
| KP1 2535 (KP1 2535) | 71 | 71 | 5  | 71 |
| KP1 2536 (KP1 2536) | 1  | 1  | 1  | 1  |
| KP1 2672 (KP1 2672) | 78 | 78 | // | 78 |
| KP1 2673 (KP1 2673) | 1  | 1  | // | 1  |
| KP1 2697 (KP1 2697) | 27 | 27 | 5  | 27 |
| KP1 2700 (KP1 2700) | 85 | 85 | 6  | 85 |
| KP1 2702 (KP1 2702) | 44 | 44 | 5  | 44 |
| KP1 2703 (KP1 2703) | 89 | 89 | 6  | 89 |
| KP1 3049 (KP1 3049) | 1  | 1  | 3  | 1  |
| KP1 3065 (KP1 3065) | 2  | 2  | 4  | 2  |
| KP1 3289 (KP1 3289) | 22 | 22 | 5  | 22 |
| KP1 3291 (KP1 3291) | 13 | 13 | 5  | 13 |
| KP1 3440 (KP1 3440) | 2  | 2  | 5  | 2  |
| KP1 3442 (KP1 3442) | 1  | 1  | 2  | 1  |
| KP1 3451 (KP1 3451) | 2  | 2  | 1  | 2  |
| KP1 3486 (KP1 3486) | 34 | 34 | 6  | 34 |
| KP1 3490 (KP1 3490) | 68 | // | 6  | // |
| KP1 3501 (KP1 3501) | 87 | 87 | 6  | 87 |
| KP1 3536 (KP1 3536) | 6  | 6  | 5  | 6  |
| KP1 3538 (KP1 3538) | 2  | 2  | 5  | 2  |
| KP1 3551 (KP1 3551) | 1  | 1  | 4  | 1  |
| KP1 3553 (KP1 3553) | 19 | 19 | 2  | 19 |
| KP1 3554 (KP1 3554) | 1  | 1  | 5  | 1  |
| KP1 3844 (KP1 3844) | 27 | 27 | 1  | 27 |
| KP1 3852 (KP1 3852) | 73 | 73 | 6  | 73 |
| KP1 3853 (KP1 3853) | 80 | 80 | 5  | 80 |
| KP1 3855 (KP1 3855) | 7  | 7  | 1  | 7  |
| KP1 3958 (KP1 3958) | 43 | 43 | // | 43 |
| KP1 3960 (KP1 3960) | 1  | 1  | 3  | 1  |
| KP1 3965 (KP1 3965) | 1  | 1  | 2  | 1  |
| KP1 4022 (KP1 4022) | 7  | 7  | 6  | 7  |
| KP1 4023 (KP1 4023) | 2  | 2  | 2  | 2  |
| KP1 4024 (KP1 4024) | 1  | 1  | 1  | 1  |
| KP1 4027 (KP1 4027) | 1  | 1  | 1  | 1  |
| KP1 4113 (KP1 4113) | 2  | 2  | 2  | 2  |
| KP1 4132 (KP1 4132) | 2  | 2  | 2  | 2  |
| KP1 4196 (KP1 4196) | 21 | 21 | 6  | 21 |
| KP1 4197 (KP1 4197) | 7  | 7  | 6  | 7  |
| KP1 4281 (KP1 4281) | 18 | 18 | 6  | 18 |
| KP1 4452 (KP1 4452) | 1  | 1  | 1  | 1  |
| KP1 4453 (KP1 4453) | 14 | 14 | 6  | 14 |
| KP1 4455 (KP1 4455) | 36 | 36 | 6  | 36 |
| KP1 4456 (KP1 4456) | 32 | 32 | 6  | 32 |

|                     |    |    |   |    |
|---------------------|----|----|---|----|
| KP1 4457 (KP1 4457) | 28 | 28 | 6 | 28 |
| KP1 4520 (KP1 4520) | 32 | 32 | 6 | 32 |
| KP1 4521 (KP1 4521) | 3  | 3  | 1 | 3  |
| KP1 4523 (KP1 4523) | 93 | 93 | 6 | 93 |
| KP1 4524 (KP1 4524) | 94 | 94 | 6 | 94 |
| KP1 4612 (KP1 4612) | 2  | 2  | 4 | 2  |
| KP1 4613 (KP1 4613) | 1  | 1  | 1 | 1  |
| KP1 4617 (KP1 4617) | 2  | 2  | 2 | 2  |
| KP1 4618 (KP1 4618) | 32 | 32 | 6 | 32 |
| KP1 4629 (KP1 4629) | 74 | 74 | 6 | 74 |
| KP1 4632 (KP1 4632) | 1  | 1  | 3 | 1  |
| KP1 4633 (KP1 4633) | 1  | 1  | 1 | 1  |
| KP1 4652 (KP1 4652) | 41 | 41 | 5 | 41 |
| KP1 4654 (KP1 4654) | 1  | 1  | 5 | 1  |
| KP1 4657 (KP1 4657) | 7  | 7  | 2 | 7  |
| KP1 4731 (KP1 4731) | 2  | 2  | 5 | 2  |
| KP1 4750 (KP1 4750) | 46 | 46 | 6 | 46 |
| KP1 4812 (KP1 4812) | 2  | 2  | 4 | 2  |
| KP1 4816 (KP1 4816) | 48 | 48 | 4 | 48 |
| KP1 4822 (KP1 4822) | 20 | 20 | 3 | 20 |
| KP1 4823 (KP1 4823) | 1  | 1  | 3 | 1  |
| KP1 4824 (KP1 4824) | 1  | 1  | 1 | 1  |
| KP1 4825 (KP1 4825) | 1  | 1  | 4 | 1  |
| KP1 4826 (KP1 4826) | 27 | 27 | 1 | 27 |
| KP1 4861 (KP1 4861) | 1  | 1  | 3 | 1  |
| KP1 4865 (KP1 4865) | 88 | 88 | 3 | 88 |
| KP1 4868 (KP1 4868) | 1  | 1  | 1 | 1  |
| KP1 4870 (KP1 4870) | 2  | 2  | 1 | 2  |
| KP1 4871 (KP1 4871) | 2  | 2  | 2 | 2  |
| KP1 4921 (KP1 4921) | 1  | 1  | 1 | 1  |
| KP1 4927 (KP1 4927) | 4  | 4  | 5 | 4  |
| KP1 4977 (KP1 4977) | 6  | 6  | 4 | 6  |
| KP1 4978 (KP1 4978) | 9  | 9  | 4 | 9  |
| KP1 4979 (KP1 4979) | 3  | 3  | 6 | 3  |
| KP1 4980 (KP1 4980) | 3  | 3  | 3 | 3  |
| KP1 4984 (KP1 4984) | 1  | 1  | 1 | 1  |
| KP1 4987 (KP1 4987) | 11 | 11 | 4 | 11 |
| KP1 4999 (KP1 4999) | 25 | 25 | 3 | 25 |
| KP1 5003 (KP1 5003) | 1  | 1  | 3 | 1  |
| KP1 5012 (KP1 5012) | 42 | 42 | 4 | 42 |
| KP1 5015 (KP1 5015) | 1  | 1  | 1 | 1  |
| KP1 5068 (KP1 5068) | 2  | 2  | 4 | 2  |
| KP1 5070 (KP1 5070) | 2  | 2  | 3 | 2  |
| KP1 5075 (KP1 5075) | 66 | 66 | 5 | 66 |
| KP1 5076 (KP1 5076) | 1  | 1  | 1 | 1  |
| KP1 5202 (KP1 5202) | 87 | 87 | 5 | 87 |
| KP1 5210 (KP1 5210) | 27 | 27 | 6 | 27 |
| KP1 5213 (KP1 5213) | 83 | 83 | 5 | 83 |
| KP1 5258 (KP1 5258) | 67 | 67 | 5 | 67 |
| KP1 5259 (KP1 5259) | 71 | 71 | 3 | 71 |

|                     |     |     |    |     |
|---------------------|-----|-----|----|-----|
| KP1 5260 (KP1 5260) | 32  | 32  | 5  | 32  |
| KP1 5262 (KP1 5262) | 10  | 10  | 4  | 10  |
| KP1 5307 (KP1 5307) | 6   | 6   | 6  | 6   |
| KP1 5309 (KP1 5309) | 82  | 82  | 6  | 82  |
| KP1 5367 (KP1 5367) | 3   | 3   | 1  | 3   |
| ksgA (KP1 0861)     | 4   | 4   | 4  | 4   |
| lacI (KP1 2640)     | 83  | 83  | 6  | 83  |
| lasT (KP1 0819)     | 4   | 4   | 5  | 4   |
| lgt (KP1 4507)      | 62  | 62  | 5  | 62  |
| lipA (KP1 1615)     | 36  | 36  | 4  | 36  |
| lon (KP1 1272)      | 98  | 98  | 6  | 98  |
| lpdA (KP1 0944)     | 74  | 74  | 5  | 74  |
| lplA (KP1 0802)     | 91  | 91  | 6  | 91  |
| map (KP1 1020)      | 75  | 75  | 6  | 75  |
| mdoC (KP1 2049)     | 77  | 77  | 6  | 77  |
| mepA (KP1 3968)     | 17  | 17  | 6  | 17  |
| metA (KP1 0251)     | 3   | 3   | 5  | 3   |
| metH (KP1 1654)     | 2   | 2   | 1  | 2   |
| metR (KP1 0185)     | 42  | 42  | 6  | 42  |
| mfd (KP1 2106)      | 111 | 111 | 5  | 111 |
| mglA (KP1 3814)     | 3   | 3   | 6  | 3   |
| mglB (KP1 3815)     | 9   | 9   | 6  | 9   |
| minC (KP1 3443)     | 2   | 2   | 6  | 2   |
| minD (KP1 3444)     | 2   | 2   | 6  | 2   |
| minE (KP1 3445)     | 2   | 2   | 2  | 2   |
| mntR (KP1 1804)     | 39  | 39  | 5  | 39  |
| mraW (KP1 0904)     | 2   | 2   | // | 2   |
| msbA (KP1 1914)     | 34  | 34  | 5  | 34  |
| msbB (KP1 3500)     | 85  | 85  | 5  | 85  |
| mtr (KP1 0784)      | //  | 2   | 5  | 2   |
| mutT (KP1 0923)     | 1   | 1   | 2  | 1   |
| nadB (KP1 4156)     | 96  | 96  | 6  | 96  |
| nadC (KP1 0932)     | 13  | 13  | 4  | 13  |
| nadD (KP1 1626)     | 3   | 3   | 5  | 3   |
| nadE (KP1 2260)     | 55  | 55  | 5  | 55  |
| nadR (KP1 0806)     | 76  | 76  | 6  | 76  |
| nagA (KP1 1648)     | 53  | 53  | 1  | 53  |
| nagB (KP1 1650)     | 7   | 7   | 5  | 7   |
| nagC (KP1 1647)     | 74  | 74  | 5  | 74  |
| nagD (KP1 1646)     | 36  | 36  | 5  | 36  |
| nagE (KP1 1651)     | 1   | 1   | 5  | 1   |
| nemA (KP1 3062)     | 49  | 49  | 6  | 49  |
| nfi (KP1 0238)      | 2   | 2   | 6  | 2   |
| nirD (KP1 5083)     | 2   | 2   | 3  | 2   |
| nrdR (KP1 1231)     | 1   | 1   | 1  | 1   |
| nudC (KP1 0236)     | 57  | 57  | 6  | 57  |
| nuoA (KP1 3922)     | 1   | 1   | 1  | 1   |
| nuoB (KP1 3921)     | 25  | 25  | // | 25  |
| nuoC (KP1 3920)     | 86  | 86  | 6  | 86  |
| nuoE (KP1 3919)     | 4   | 4   | 1  | 4   |



|                  |     |     |    |     |
|------------------|-----|-----|----|-----|
| nuoF (KP1 3917)  | 68  | 68  | 6  | 68  |
| ompX (KP1 1801)  | 2   | 2   | 3  | 2   |
| osmE (KP1 2261)  | 1   | 1   | 1  | 1   |
| pabA (KP1 5074)  | 1   | 1   | 3  | 1   |
| pabC (KP1 2085)  | 3   | 3   | 6  | 3   |
| pagP (KP1 1610)  | 9   | 9   | 3  | 9   |
| pduW (KP1 4491)  | 50  | 50  | 6  | 50  |
| pduX (KP1 4492)  | 49  | 49  | 6  | //  |
| pdxA (KP1 0862)  | 5   | 5   | 5  | 5   |
| pdxB (KP1 3959)  | 64  | 64  | 6  | 64  |
| pdxH (KP1 3048)  | 5   | 5   | 6  | 5   |
| pdxY (KP1 3046)  | 55  | 55  | 6  | 55  |
| pepD (KP1 1095)  | 54  | 54  | 5  | 54  |
| pepP (KP1 4631)  | 73  | 73  | 13 | 73  |
| pfkB (KP1 3290)  | 16  | 16  | 5  | 16  |
| pgk (KP1 4643)   | 50  | 50  | // | 50  |
| pitA (KP1 5198)  | 2   | 2   | 3  | 2   |
| pldB (KP1 0182)  | 4   | 4   | 4  | 4   |
| plsX (KP1 2079)  | 39  | 39  | 4  | 39  |
| polA (KP1 0024)  | 103 | 103 | 18 | 103 |
| potH (KP1 1850)  | 78  | 78  | 5  | 78  |
| potI (KP1 1852)  | 7   | 7   | 6  | 7   |
| ppdA (KP1 4504)  | 6   | 6   | 6  | 6   |
| ppdD (KP1 0931)  | 39  | 39  | 1  | 39  |
| ppiA (KP1 5077)  | 1   | 1   | 4  | 1   |
| ppiD (KP1 1274)  | 93  | 93  | 6  | 93  |
| ppnK (KP1 4193)  | 66  | 66  | 6  | 66  |
| prfA (KP1 3349)  | 67  | 67  | 4  | 67  |
| prfC (KP1 0789)  | 7   | 7   | 5  | 7   |
| priB (KP1 0469)  | 1   | 1   | 2  | 1   |
| prkB (KP1 5069)  | 64  | 64  | 4  | 64  |
| prlC (KP1 5203)  | 103 | 103 | 5  | 103 |
| prmA (KP1 4986)  | 4   | 4   | 5  | 4   |
| ptrB (KP1 3489)  | 115 | 115 | 6  | 115 |
| ptsG (KP1 1307)  | 44  | 44  | 4  | 44  |
| ptsG2 (KP1 2090) | 22  | 22  | 5  | 22  |
| ptsN (KP1 4926)  | 5   | 5   | 5  | 5   |
| ptsO (KP1 4928)  | 1   | 1   | 1  | 1   |
| ptsP (KP1 4508)  | 103 | 103 | 6  | 103 |
| purT (KP1 3491)  | 91  | 91  | 5  | 91  |
| pyrD (KP1 1946)  | 5   | 5   | 4  | 5   |
| pyrH (KP1 1024)  | 2   | 2   | 2  | 2   |
| rbsB (KP1 0010)  | 2   | 2   | 5  | 2   |
| rbsC (KP1 0009)  | 11  | 11  | 5  | 11  |
| rbsK (KP1 0011)  | 35  | 35  | 6  | 35  |
| rcsA (KP1 3552)  | 42  | 42  | 2  | 42  |
| rfaH (KP1 0199)  | 1   | 1   | 1  | 1   |
| rhaA (KP1 0071)  | 76  | 76  | 5  | 76  |
| rhaB (KP1 0072)  | 74  | 74  | 5  | 74  |
| rhaD (KP1 0070)  | 56  | 56  | 5  | 56  |

|                  |    |    |    |    |
|------------------|----|----|----|----|
| rhaR (KP1 0074)  | 2  | 2  | 5  | 2  |
| rhaS (KP1 0073)  | 2  | 2  | 5  | 2  |
| rhaT (KP1 0075)  | 2  | 2  | 5  | 2  |
| rhtB (KP1 0181)  | 10 | 10 | 4  | 10 |
| ribB (KP1 4736)  | 38 | 38 | 6  | 38 |
| rimI (KP1 0787)  | 38 | 38 | 5  | 38 |
| rlpB (KP1 1628)  | 1  | 1  | 3  | 1  |
| rnt (KP1 3064)   | 1  | 1  | 3  | 1  |
| rpe (KP1 5087)   | 39 | 39 | 1  | 39 |
| rpmE2 (KP1 1310) | 2  | 2  | 4  | 2  |
| rpoN (KP1 4924)  | 70 | 70 | 5  | 70 |
| rsd (KP1 0235)   | 4  | 4  | 3  | 4  |
| rsuA (KP1 3847)  | 46 | 46 | 1  | 46 |
| ruvA (KP1 3506)  | 1  | 1  | 5  | 1  |
| ruvB (KP1 3505)  | 3  | 3  | 3  | 3  |
| sbp (KP1 5365)   | 83 | 83 | 6  | 83 |
| secB (KP1 5302)  | 1  | 1  | 1  | 1  |
| secY (KP1 5019)  | 1  | 1  | 1  | 1  |
| serB (KP1 0804)  | 14 | 14 | 2  | 14 |
| setA (KP1 0883)  | 46 | 46 | 6  | 46 |
| sfsA (KP1 0974)  | 30 | 30 | 1  | 30 |
| smf (KP1 5004)   | 73 | 73 | 3  | 73 |
| smp (KP1 0803)   | 57 | 57 | 6  | 57 |
| smpA (KP1 4195)  | 2  | 2  | 2  | 2  |
| smpB (KP1 4198)  | 2  | 2  | 6  | 2  |
| sms (KP1 0805)   | 80 | 80 | 6  | 80 |
| sodA (KP1 0076)  | 1  | 1  | 1  | 1  |
| spy (KP1 2258)   | 1  | 1  | 4  | 1  |
| srmB (KP1 4158)  | 83 | 83 | 6  | 83 |
| ssb (KP1 0302)   | 2  | 2  | 4  | 2  |
| ssuA (KP1 1943)  | 10 | 10 | 6  | 10 |
| ssuC (KP1 1941)  | 5  | 5  | 5  | 5  |
| ssuD (KP1 1942)  | 12 | 12 | // | 12 |
| ssuE (KP1 1944)  | 53 | 53 | 6  | 53 |
| sugE (KP1 0420)  | 6  | 6  | 5  | 6  |
| suhB (KP1 4117)  | 42 | 42 | 5  | 42 |
| tatA (KP1 0195)  | 1  | 1  | 1  | 1  |
| tatB (KP1 0196)  | 39 | 39 | // | 39 |
| tatC (KP1 0197)  | 4  | 4  | 1  | 4  |
| tatD (KP1 0198)  | 77 | 77 | 6  | 77 |
| tatE (KP1 1614)  | 2  | 2  | 3  | 2  |
| tbpA (KP1 0880)  | 6  | 6  | 6  | 6  |
| thiJ (KP1 1244)  | 64 | 64 | 15 | 64 |
| thrA (KP1 0820)  | 99 | 99 | 6  | 99 |
| thrB (KP1 0822)  | 2  | 2  | 3  | 2  |
| thyA (KP1 4505)  | 8  | 8  | 6  | 8  |
| tig (KP1 1269)   | 5  | 5  | 5  | 5  |
| tkrA (KP1 5261)  | 19 | 19 | 5  | 19 |
| tmk (KP1 2087)   | 2  | 2  | 2  | 2  |
| tolQ (KP1 1699)  | 2  | 2  | 4  | 2  |

|                 |    |    |    |    |
|-----------------|----|----|----|----|
| tolR (KP1 1700) | 1  | 1  | 3  | 1  |
| trmA (KP1 0119) | 16 | 16 | 6  | 16 |
| trpS (KP1 5085) | 54 | 54 | 5  | 54 |
| truA (KP1 3957) | 2  | 2  | 3  | 2  |
| tsf (KP1 1022)  | 1  | 1  | 1  | 1  |
| tsx (KP1 1229)  | 19 | 19 | 5  | 19 |
| tyrP (KP1 3537) | 91 | 91 | 6  | 91 |
| tyrS (KP1 3047) | 5  | 5  | 6  | 5  |
| ubiB (KP1 0194) | 84 | 84 | 6  | 84 |
| ubiD (KP1 0200) | 25 | 25 | 6  | 25 |
| ubiE (KP1 0191) | 2  | 2  | 6  | 2  |
| udp (KP1 0189)  | 79 | 79 | 6  | 79 |
| ung (KP1 4160)  | 56 | 56 | 5  | 56 |
| uppP (KP1 4748) | 29 | 29 | 3  | 29 |
| ureA (KP1 4757) | 30 | 30 | 5  | 30 |
| ureB (KP1 4756) | 3  | 3  | 3  | 3  |
| ureD (KP1 4753) | 75 | 75 | 6  | 75 |
| uspA (KP1 5200) | 3  | 3  | 3  | 3  |
| uvrA (KP1 0301) | 2  | 2  | // | 2  |
| xerC (KP1 0170) | 11 | 11 | 5  | 11 |
| xerD (KP1 4610) | 1  | 1  | 1  | 1  |
| yabF (KP1 0856) | 52 | 52 | 4  | 52 |
| yabI (KP1 0877) | 15 | 15 | 6  | 15 |
| yabN (KP1 0881) | 96 | 96 | 6  | 96 |
| yacG (KP1 0924) | 1  | 1  | 2  | 1  |
| yadB (KP1 0972) | 18 | 18 | 6  | 18 |
| yadG (KP1 0962) | 3  | 3  | 6  | 3  |
| yadH (KP1 0963) | 3  | 3  | 2  | 3  |
| yadI (KP1 0964) | 2  | 2  | 5  | 2  |
| yafC (KP1 1066) | 70 | 70 | 5  | 70 |
| yafE (KP1 1069) | 9  | 9  | 5  | 9  |
| yafP (KP1 1094) | 71 | 71 | 4  | 71 |
| yajI (KP1 1230) | 2  | 2  | 4  | 2  |
| yajR (KP1 1247) | 22 | 22 | 6  | 22 |
| ybaL (KP1 1337) | 90 | 90 | 5  | 90 |
| ybeF (KP1 1616) | 60 | 60 | 5  | 60 |
| ybeM (KP1 1613) | 2  | 2  | 5  | 2  |
| ybfF (KP1 1662) | 4  | 4  | 5  | 4  |
| ybhA (KP1 1724) | 74 | 74 | 4  | 74 |
| ybhE (KP1 1725) | 27 | 27 | 5  | 27 |
| ybiF (KP1 1800) | 79 | 79 | 5  | 79 |
| ybiP (KP1 1802) | 92 | 92 | 6  | 92 |
| ybiR (KP1 1805) | 84 | 84 | 6  | 84 |
| ybjE (KP1 1874) | 70 | 70 | 5  | 70 |
| ycdT (KP1 0782) | 3  | 3  | 6  | 3  |
| ycdY (KP1 2045) | 3  | 3  | 6  | 3  |
| ycdZ (KP1 2046) | 1  | 1  | 3  | 1  |
| yceF (KP1 2076) | 32 | 32 | 5  | 32 |
| yceG (KP1 2086) | 3  | 3  | 6  | 3  |
| ycfH (KP1 2089) | 54 | 54 | 6  | 54 |

|                 |     |     |    |     |
|-----------------|-----|-----|----|-----|
| ycfQ (KP1 2102) | 6   | 6   | 6  | 6   |
| ycfS (KP1 2105) | 85  | 85  | 5  | 85  |
| ycfU (KP1 2107) | 73  | 73  | 5  | 73  |
| ycfV (KP1 2108) | 31  | 31  | 4  | 31  |
| ycfW (KP1 2109) | 50  | 50  | 5  | 50  |
| ycgM (KP1 3441) | 2   | 2   | 5  | 2   |
| yehQ (KP1 3347) | 5   | 5   | 4  | 5   |
| ydgB (KP1 2533) | 5   | 5   | 6  | 5   |
| ydgI (KP1 2534) | 99  | 99  | 6  | 99  |
| ydhM (KP1 3061) | 2   | 2   | 5  | 2   |
| ydhO (KP1 3066) | 2   | 2   | 1  | 2   |
| yeaA (KP1 2223) | 1   | 1   | 1  | 1   |
| yeaE (KP1 2219) | 76  | 76  | 6  | 76  |
| yeaY (KP1 3448) | 64  | 64  | 6  | 64  |
| yeaZ (KP1 3449) | 5   | 5   | 6  | 5   |
| yebG (KP1 3492) | 2   | 2   | 4  | 2   |
| yedI (KP1 3557) | 9   | 9   | 6  | 9   |
| yejE (KP1 3842) | 76  | 76  | 6  | 76  |
| yejK (KP1 3854) | 3   | 3   | 5  | 3   |
| yejM (KP1 3856) | 7   | 7   | 6  | 7   |
| yfcA (KP1 3967) | 10  | 10  | 5  | 10  |
| yfcD (KP1 3935) | 1   | 1   | 1  | 1   |
| yfcF (KP1 3937) | 55  | 55  | 6  | 55  |
| yfcG (KP1 3938) | 7   | 7   | // | 7   |
| yfcM (KP1 3966) | 1   | 1   | 1  | 1   |
| yfhA (KP1 4133) | 9   | 9   | 6  | 9   |
| yfhG (KP1 4134) | //  | //  | 5  | //  |
| yfhK (KP1 4135) | 10  | 10  | 6  | 10  |
| yfhQ (KP1 4116) | 54  | 54  | 3  | 54  |
| yfiC (KP1 4157) | 65  | 65  | 4  | 65  |
| yfiD (KP1 4159) | 1   | 1   | 4  | 1   |
| ygaH (KP1 4275) | 39  | 39  | 3  | 39  |
| ygdP (KP1 4509) | 1   | 1   | 2  | 1   |
| yggA (KP1 4640) | 32  | 32  | 6  | 32  |
| yggB (KP1 4641) | 3   | 3   | 5  | 3   |
| yggE (KP1 4639) | 1   | 1   | 10 | 1   |
| ygiC (KP1 4732) | 76  | 76  | 3  | 76  |
| ygiD (KP1 4734) | 64  | 64  | 6  | 64  |
| ygiE (KP1 4735) | 11  | 11  | 5  | 11  |
| ygjR (KP1 4813) | 2   | 2   | 2  | 2   |
| ygjT (KP1 4814) | 40  | 40  | 5  | 40  |
| ygjU (KP1 4815) | 19  | 19  | 4  | 19  |
| yhbG (KP1 4923) | 6   | 6   | 4  | 6   |
| yhbH (KP1 4925) | 1   | 1   | 1  | 1   |
| yhbN (KP1 4922) | 4   | 4   | 1  | 4   |
| yhbO (KP1 4867) | 10  | 10  | 1  | 10  |
| yhbU (KP1 4873) | 73  | 73  | 5  | 73  |
| yhbV (KP1 4874) | 62  | 62  | 5  | 62  |
| yhbW (KP1 4875) | 78  | 78  | // | 78  |
| yheS (KP1 5066) | 102 | 102 | 5  | 102 |

|                 |    |    |    |    |
|-----------------|----|----|----|----|
| yheT (KP1 5067) | 76 | 76 | 5  | 76 |
| yhfC (KP1 5079) | 66 | 66 | 5  | 66 |
| yhiO (KP1 5199) | 1  | 1  | 1  | 1  |
| yhiP (KP1 5201) | 2  | 2  | 4  | 2  |
| yibN (KP1 5304) | 1  | 1  | 1  | 1  |
| yibO (KP1 5306) | 94 | 94 | 6  | 94 |
| yicE (KP1 5373) | 21 | 21 | 5  | 21 |
| yieP (KP1 0014) | 47 | 47 | 1  | 47 |
| yigB (KP1 0171) | 71 | 71 | 3  | 71 |
| yigM (KP1 0184) | 2  | 2  | 5  | 2  |
| yigN (KP1 0190) | 2  | 2  | 6  | 2  |
| yijC (KP1 0117) | 9  | 9  | 5  | 9  |
| yjaB (KP1 0250) | 1  | 1  | 1  | 1  |
| yjgB (KP1 0570) | 95 | 95 | 6  | 95 |
| yjjA (KP1 0769) | 24 | 24 | 6  | 24 |
| yjjB (KP1 0772) | 35 | 35 | 5  | 35 |
| yjjG (KP1 0788) | 50 | 50 | // | 50 |
| yjjK (KP1 0808) | 83 | 83 | 6  | 83 |
| yjjP (KP1 0773) | 56 | 56 | 6  | 56 |
| ykfE (KP1 1532) | 7  | 7  | 5  | 7  |
| yneH (KP1 2676) | 78 | 78 | // | 78 |
| yneI (KP1 2675) | 88 | 88 | // | 88 |
| yneJ (KP1 2674) | 1  | 1  | // | 1  |
| ypeA (KP1 4026) | 37 | 37 | 1  | 37 |
| yqfA (KP1 4615) | 69 | 69 | 5  | 69 |
| yqgF (KP1 4658) | 6  | 6  | 6  | 6  |
| yraO (KP1 4862) | 3  | 3  | 1  | 3  |
| yraP (KP1 4864) | 1  | 1  | 3  | 1  |
| yraR (KP1 4866) | 34 | 34 | // | 34 |
| yrbI (KP1 4920) | 2  | 2  | 3  | 2  |
| yrdA (KP1 4998) | 17 | 17 | 4  | 17 |
| yrdC (KP1 5001) | 13 | 13 | 2  | 13 |
| yrdD (KP1 5002) | 2  | 2  | 2  | 2  |
| znuA (KP1 3502) | // | // | 6  | // |
| znuB (KP1 3504) | 5  | 5  | 6  | 5  |
| znuC (KP1 3503) | 4  | 4  | 5  | 4  |
| zraP (KP1 0243) | 17 | 17 | 4  | 17 |

---
